# Supplementary material for: Magnetic micro-device for manipulating PC12 cell migration and organization
Source: Royal Society of Chemistry journal article supplement (doi:10.1039/c5lc00035a), 2015-01-01
Supplement: c5lc00035a1.pdf [file c5lc00035a1.pdf]

## Supplementary material

# Magnetic micro-device for manipulating PC12 cells migration and organization

N. Alon<sup>a,d</sup>, T. Havdala<sup>b,d</sup>, H. Skaat<sup>c,d</sup>, K. Baranes<sup>a,d</sup>, M. Marcus<sup>a,d</sup>, I. Levy<sup>c,d</sup>, S. Margel<sup>c,d</sup>, A. Sharoni<sup>b,d,†</sup> and O. Shefi<sup>a,d,†</sup>

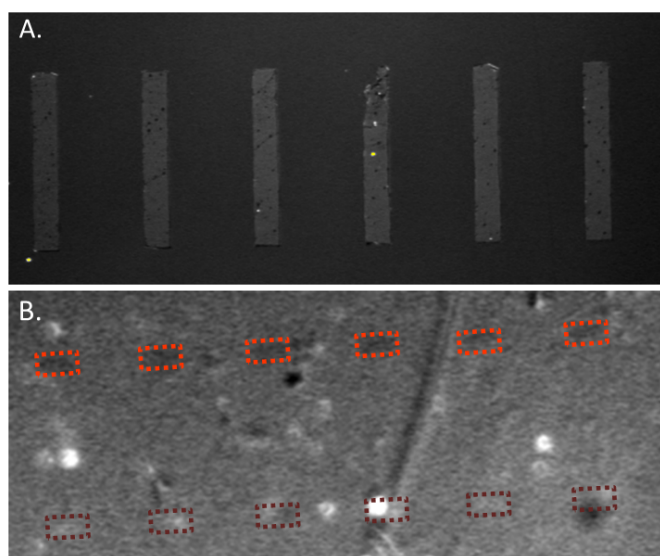

Fig. S1 Magneto-optic imaging of the ferromagnetic bars. (A) An optical view of several ferromagnets. (B) A magneto-optical image of the ferromagnets through an indicator made of a magneto-optic material. The dark and bright areas (marked with bright red and dark red dotted rectangles) indicate the peaks of the magnetic field, and its polarity, at the edges of the bars.

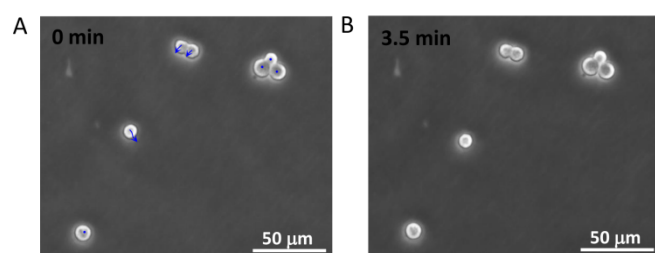

Fig. S2 (A) Cells treated with MNPs plated in culture with no external magnetic field. Blue arrows indicate the movement of the cells from time zero (0 min) and along 3.5 min. (B) Same cells as in A at final locations after 3.5 min.
