# Supplementary material for: Magnetic micro-device for manipulating PC12 cell migration and organization
Source: Royal Society of Chemistry journal article supplement (doi:10.1039/c5lc00035a), 2015-01-01
Supplement: c5lc00035a2.pdf [file c5lc00035a2.pdf]

The magnetic force acting on a cluster of magnetic nanoparticles,  $F_{\text{mag}} = V_x \cdot M_{\text{sat}} \cdot \mu_0^{-1} \cdot \nabla B_x$ , is balanced by the drag force,  $F_{\text{drag}} = 3\pi \cdot \mu \cdot d_{\text{cell}} \cdot v$ , and therefore  $F_{\text{mag}} = F_{\text{drag}}$  (Tseng et al., 2009). By solving this equation we obtain the estimated volume of the MNPs cluster per cell, and the number of MNPs per cell.

Detailed calculation:

$$F_{\text{drag}} = 3\pi \cdot \mu \cdot d_{\text{cell}} \cdot v$$

Medium viscosity  $\mu = 7.3 \cdot 10^{-4} \text{ pa} \cdot \text{s}$

Cell diameter  $d = 8 \cdot 10^{-6} \text{ m}$

Cell velocity  $v = 10 \mu\text{m}/\text{min} = 1.7 \cdot 10^{-7} \text{ m/s}$

↓

The drag force:  $F_{\text{drag}} \cong 9 \cdot 10^{-15} \text{ N}$

$$F_{\text{mag}} = V_x \cdot M_{\text{sat}} \cdot \mu_0^{-1} \cdot \nabla B_x$$

Saturation magnetization of the NPs:  $M_{\text{sat}} = 60 \text{ emu/g} = 312 \text{ emu/cm}^3$

Density of an iron oxide NP:  $\rho = 5.2 \text{ g/cm}^3$

In SI units ( $1 \text{ emu/cm}^3 = 10^3 \text{ A/m}$ )<sup>a</sup>:  $M_{\text{sat}} \cdot \mu_0^{-1} \cong 3 \cdot 10^5 \text{ A/m}$

The magnetic gradient at  $x=2 \text{ cm}$ <sup>b</sup>:  $\nabla B_{x=2} \cong 3 \text{ T/m}$

Estimation of the volume of the NPs cluster:  $V_x = ?$

⇓

$$9 \cdot 10^{-15} = V \cdot 3 \cdot 10^5 \cdot 3$$

Volume of the MNPs cluster:  $V = 1 \cdot 10^{-20} \text{ m}^3$

Volume of a single MNP:  $\frac{4}{3} \cdot \pi \cdot (7.5 \cdot 10^{-9})^3 \cong 10^{-24} \text{ m}^3$

⇓

$$\text{Number of MNPs per cell} \cong 10,000$$

Notes

- Taking into account that  $\mu_0$  is dimensionless and equal to 1 in cgs system.
- According to measurements.
